# Supplementary material
Source: PubMed Central journal article supplement (PMC1425849)

kDa

1 2 3 4

160—

120—

90—

70—

60—

50—

40—

30—

25—

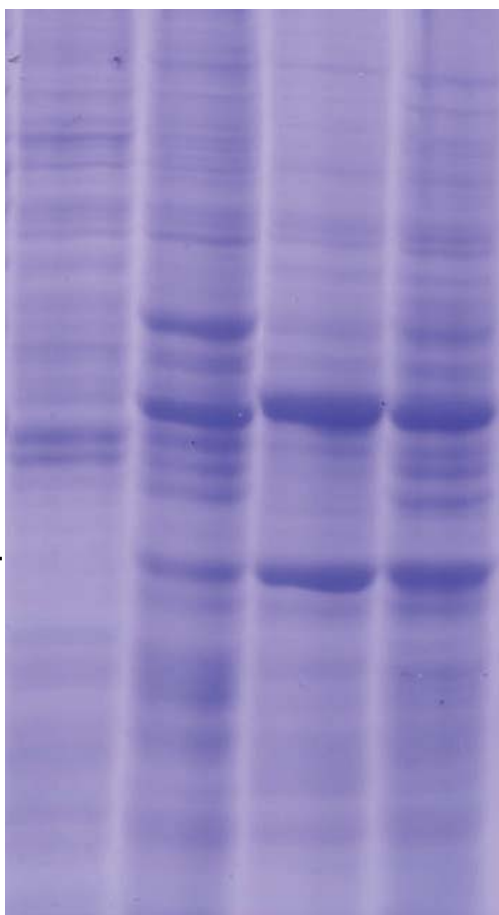

1. mock-infected
2. CYP710A1
3. CYP710A2
4. CYP710A11

Supplement: plntcell_tpc.105.036012_1.pdf [file plntcell_tpc.105.036012_1.pdf]

# Supplemental Figure 3

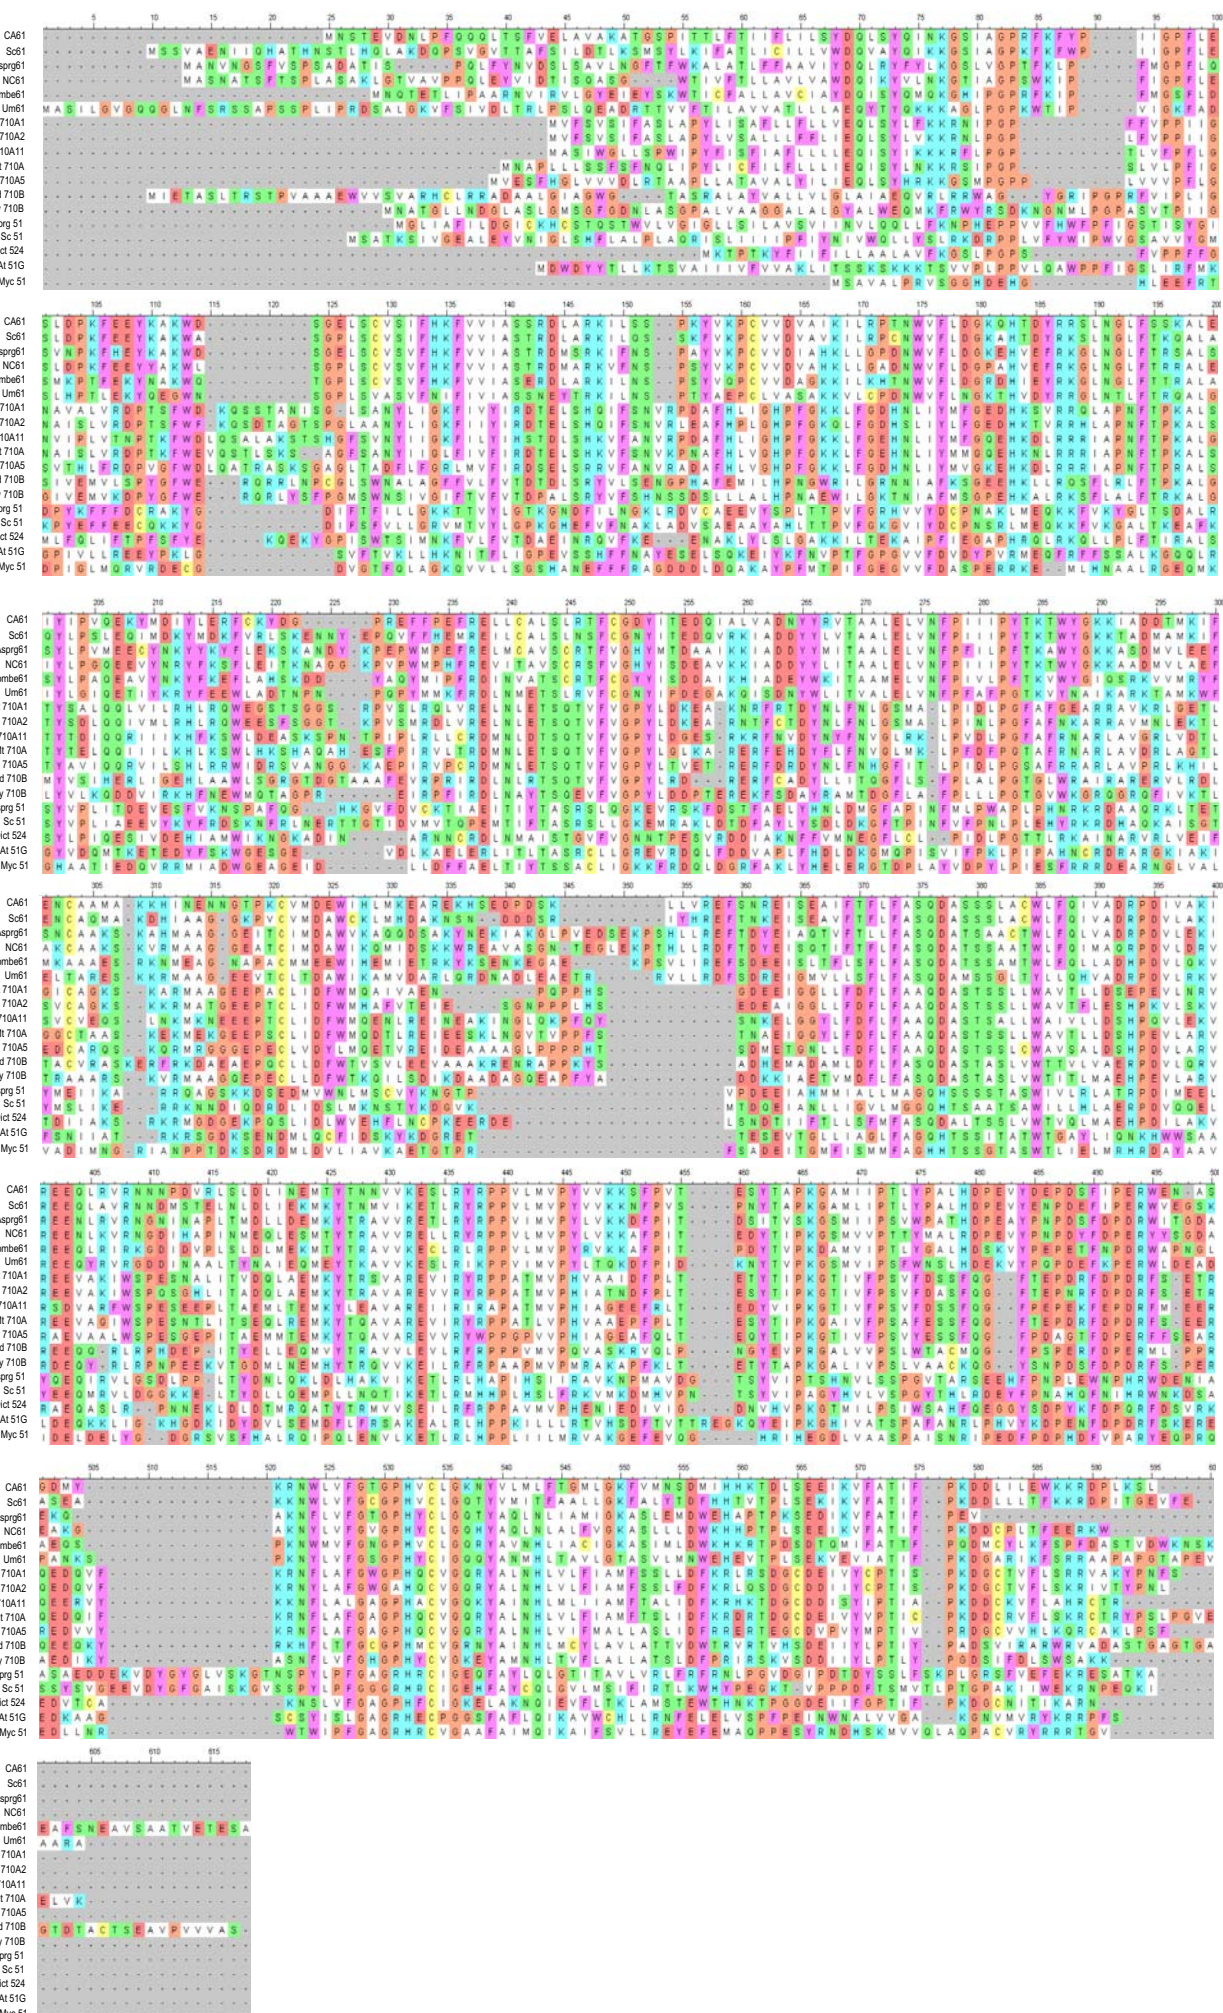

Supplement: plntcell_tpc.105.036012_2.pdf [file plntcell_tpc.105.036012_2.pdf]
